# Supplementary material for: Bidentate chelating ligands as effective passivating materials for perovskite light-emitting diodes
Source: Royal Society of Chemistry journal article supplement (doi:10.1039/c8cp07000h), 2019-01-01
Supplement: c8cp07000h1.pdf [file c8cp07000h1.pdf]

## Supporting Information

### Bidentate chelating ligands as effective passivating materials for perovskite light-emitting diodes

Ming-Chuan Hsiao, Ping-Cheng Chien, Lu-Syuan Jhuang and Fang-Chung Chen\*

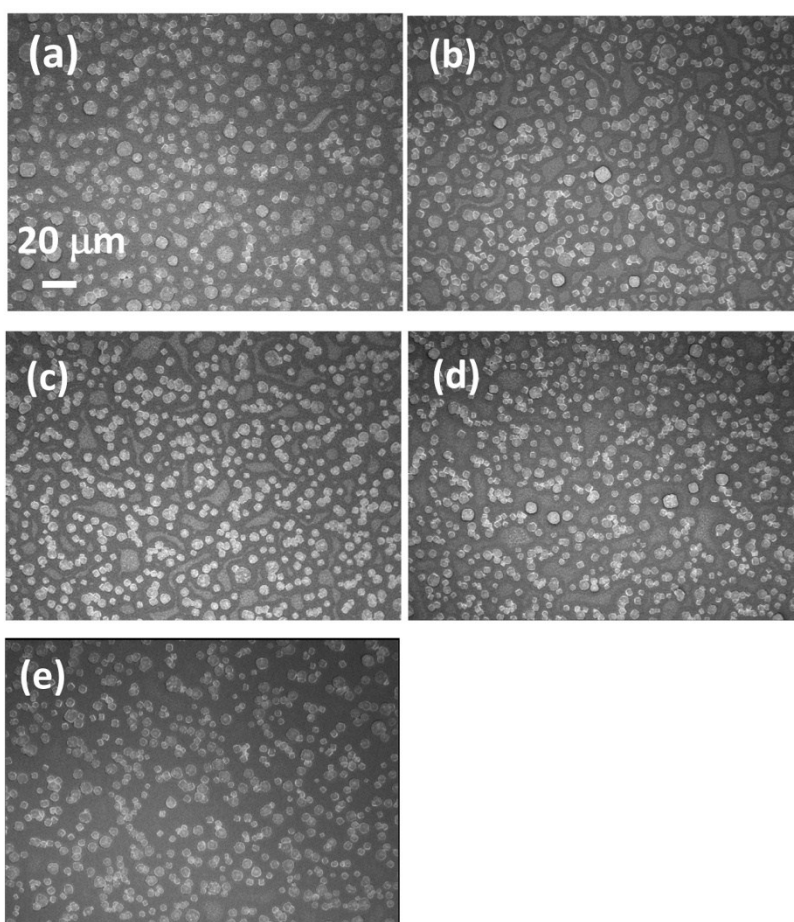

**Figure S1.** The SEM images of the  $\text{CH}_3\text{NH}_3\text{PbBr}_3$  thin films after various surface treatments : (a) without any treatment; (b) 1,10-phenanthroline; (c) 4,4'-bipyridine; (d) pyridine; (e) Bphen.

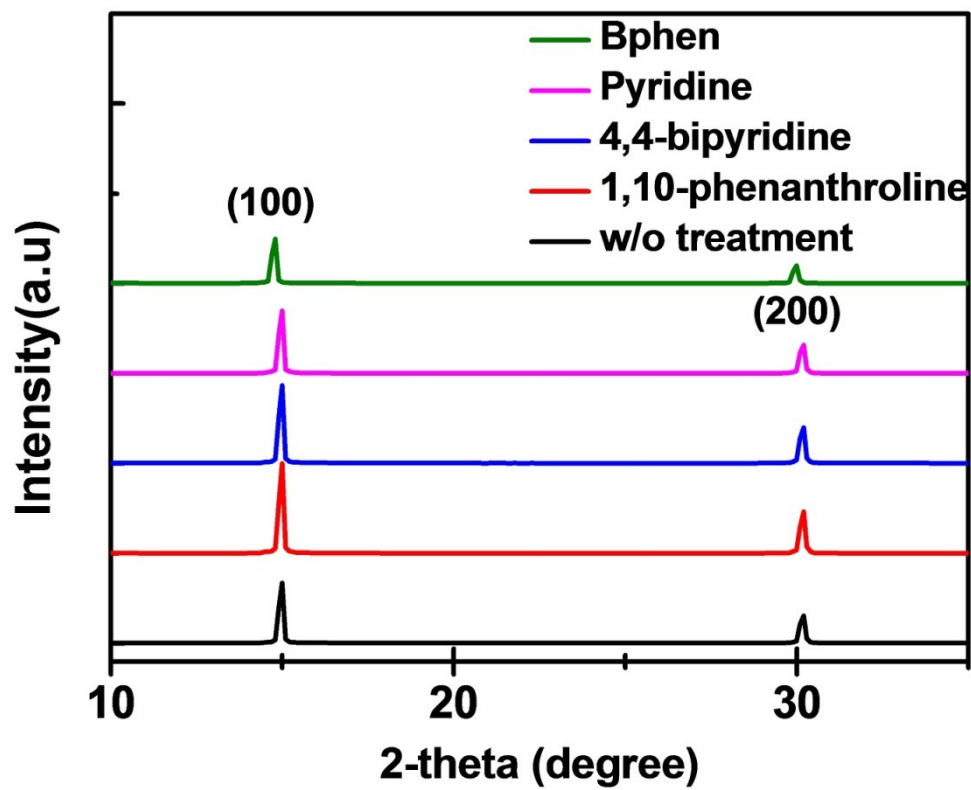

**Figure S2.** The magnified XRD images of the  $\text{CH}_3\text{NH}_3\text{PbBr}_3$  thin films after various surface treatments.
